# Supplementary material
Source: MDPI journal article supplement (https://www.mdpi.com/2075-4701/13/4/812)
Supplement: s1 [file s1]

| Table S1. Physical properties of chemical elements used in machine learning model |    |                               |                           |                           |                          |                                           |                       |        |                          |                                      |
|-----------------------------------------------------------------------------------|----|-------------------------------|---------------------------|---------------------------|--------------------------|-------------------------------------------|-----------------------|--------|--------------------------|--------------------------------------|
| Element                                                                           | Z  | $m_{\text{a}}, \text{a.e.m.}$ | $r_{\text{c}}, \text{pm}$ | $E_{\text{i}}, \text{eV}$ | $T_{\text{m}}, \text{K}$ | $C_{\text{s}}, \text{J/(g}\cdot\text{K)}$ | $\rho, \text{g/cm}^3$ | $\chi$ | $T_{\text{b}}, \text{K}$ | $\lambda, \text{W/(m}\cdot\text{K)}$ |
| Li                                                                                | 3  | 6.941                         | 121                       | 5.3917                    | 453.7                    | 3.6                                       | 0.535                 | 1      | 1603                     | 85                                   |
| Be                                                                                | 4  | 9.0121                        | 96                        | 9.3226                    | 1570                     | 1.82                                      | 1.848                 | 1.6    | 2742                     | 190                                  |
| B                                                                                 | 5  | 10.811                        | 84                        | 8.298                     | 2348                     | 1.02                                      | 2.46                  | 2      | 4200                     | 27                                   |
| Mg                                                                                | 12 | 24.305                        | 141                       | 7.6462                    | 923                      | 1.02                                      | 1.738                 | 1.3    | 1363                     | 160                                  |
| Al                                                                                | 13 | 26.9815                       | 121                       | 5.9858                    | 933.5                    | 0.9                                       | 2.7                   | 1.6    | 2743                     | 235                                  |
| Si                                                                                | 14 | 28.0855                       | 111                       | 8.1517                    | 1687                     | 0.71                                      | 2.33                  | 1.9    | 3538                     | 150                                  |
| P                                                                                 | 15 | 30.9737                       | 107                       | 10.487                    | 317.3                    | 0.77                                      | 1.823                 | 2.2    | 553.7                    | 0.236                                |
| Ca                                                                                | 20 | 40.078                        | 176                       | 6.1132                    | 1115                     | 0.63                                      | 1.55                  | 1      | 1757                     | 200                                  |
| Sc                                                                                | 21 | 44.9559                       | 170                       | 6.5614                    | 1814                     | 0.6                                       | 2.985                 | 1.4    | 3109                     | 16                                   |
| Ti                                                                                | 22 | 47.867                        | 160                       | 6.8282                    | 1941                     | 0.52                                      | 4.507                 | 1.5    | 3560                     | 22                                   |
| Cr                                                                                | 24 | 51.9961                       | 139                       | 6.7666                    | 2180                     | 0.45                                      | 7.14                  | 1.7    | 2944                     | 94                                   |
| Fe                                                                                | 26 | 55.845                        | 132                       | 7.9024                    | 1811                     | 0.44                                      | 7.874                 | 1.8    | 3134                     | 80                                   |
| Co                                                                                | 27 | 58.933                        | 126                       | 7.881                     | 1768                     | 0.42                                      | 8.9                   | 1.9    | 3200                     | 100                                  |
| Ni                                                                                | 28 | 58.6934                       | 124                       | 7.6398                    | 1728                     | 0.44                                      | 8.908                 | 1.9    | 3003                     | 91                                   |
| Cu                                                                                | 29 | 63.546                        | 132                       | 7.7264                    | 1358                     | 0.38                                      | 8.92                  | 1.9    | 2835                     | 400                                  |
| Zn                                                                                | 30 | 65.38                         | 122                       | 9.3941                    | 692.7                    | 0.39                                      | 7.14                  | 1.7    | 1180                     | 120                                  |
| Y                                                                                 | 39 | 88.906                        | 190                       | 6.217                     | 1799                     | 0.3                                       | 4.472                 | 1.2    | 17                       | 3203                                 |
| Zr                                                                                | 40 | 91.224                        | 175                       | 6.6339                    | 2128                     | 0.27                                      | 6.511                 | 1.3    | 4650                     | 23                                   |
| Nb                                                                                | 41 | 92.906                        | 164                       | 6.7589                    | 2750                     | 0.26                                      | 8.57                  | 1.6    | 5017                     | 54                                   |
| Mo                                                                                | 42 | 95.96                         | 154                       | 7.0924                    | 2896                     | 0.25                                      | 10.28                 | 2.2    | 4912                     | 139                                  |
| Pd                                                                                | 46 | 106.42                        | 139                       | 8.3369                    | 1828                     | 0.24                                      | 12.023                | 2.2    | 3236                     | 72                                   |
| Ag                                                                                | 47 | 107.87                        | 144                       | 7.5762                    | 1235                     | 0.235                                     | 10.49                 | 1.9    | 2435                     | 430                                  |
| Sn                                                                                | 50 | 118.71                        | 139                       | 7.3438                    | 505.1                    | 0.227                                     | 7.31                  | 2      | 2875                     | 67                                   |
| La                                                                                | 57 | 138.91                        | 207                       | 5.577                     | 1193                     | 0.19                                      | 6.146                 | 1.1    | 3737                     | 13                                   |
| Ce                                                                                | 58 | 140.116                       | 204                       | 5.5387                    | 1071                     | 0.19                                      | 6.689                 | 1.1    | 3716                     | 11                                   |
| Pr                                                                                | 59 | 140.908                       | 203                       | 5.464                     | 1204                     | 0.19                                      | 6.64                  | 1.1    | 3403                     | 13                                   |
| Gd                                                                                | 64 | 157.25                        | 196                       | 6.15                      | 1568                     | 0.23                                      | 7.901                 | 1.2    | 3273                     | 11                                   |
| Er                                                                                | 68 | 167.26                        | 189                       | 6.1078                    | 1770                     | 0.17                                      | 9.066                 | 1.2    | 3141                     | 15                                   |
| Hf                                                                                | 72 | 178.49                        | 175                       | 6.8251                    | 2506                     | 0.14                                      | 13.31                 | 1.3    | 4876                     | 23                                   |
| Ta                                                                                | 73 | 180.9479                      | 170                       | 7.89                      | 3290                     | 0.14                                      | 16.65                 | 1.5    | 5731                     | 57                                   |
| W                                                                                 | 74 | 183.85                        | 162                       | 7.98                      | 3695                     | 0.13                                      | 19.25                 | 2.4    | 6203                     | 170                                  |
| Au                                                                                | 79 | 196.967                       | 136                       | 9.2257                    | 1337                     | 0.128                                     | 19.3                  | 2.6    | 3243                     | 320                                  |
